# Supplementary material for: Silk® Flow Diverter Device for Intracranial Aneurysm Treatment: A Systematic Review and Meta-Analysis
Source: PubMed Central journal article supplement — Neurointervention. 2021 Sep 14;16(3):222–31. doi: 10.5469/neuroint.2021.00234 (PMC8561040; doi:10.5469/neuroint.2021.00234), 2021-09-14
Supplement: neuroint-2021-00234-suppl.pdf [file neuroint-2021-00234-suppl.pdf]

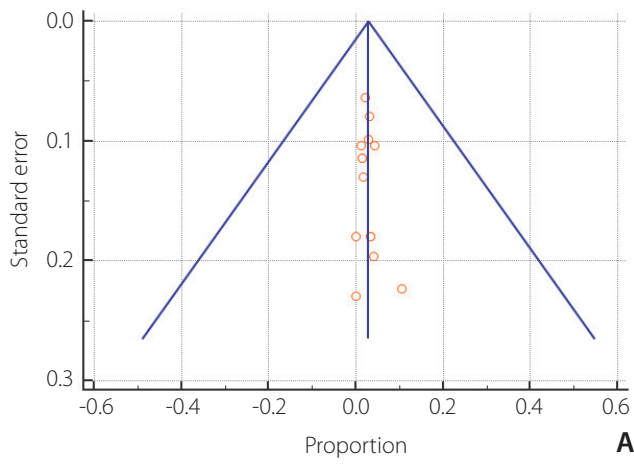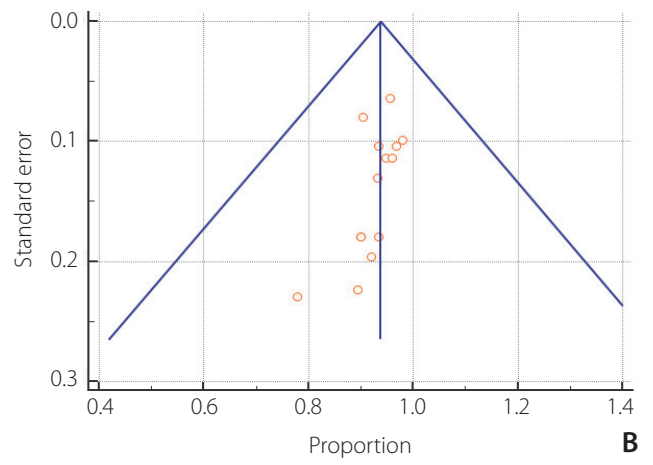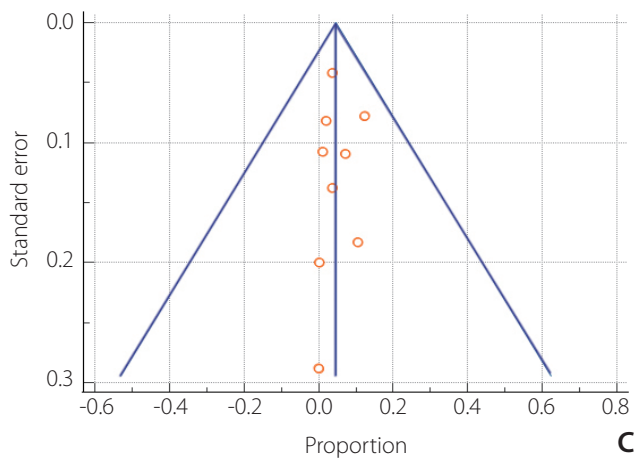

**Supplementary Fig. 1.** Funnel plot that evaluates the risk of publication bias in clinical outcome: (A) mortality, (B) good neurological outcome, (C) poor neurological outcome.

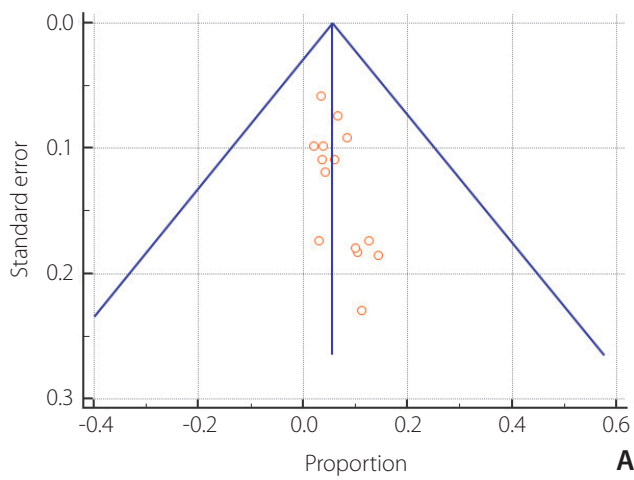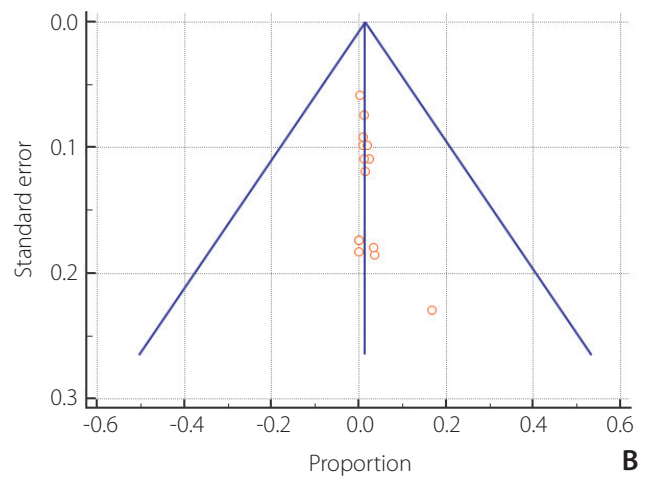

**Supplementary Fig. 2.** Funnel plot that evaluates risk of publication bias in complications: (A) thromboembolic complications, (B) hemorrhagic complication.

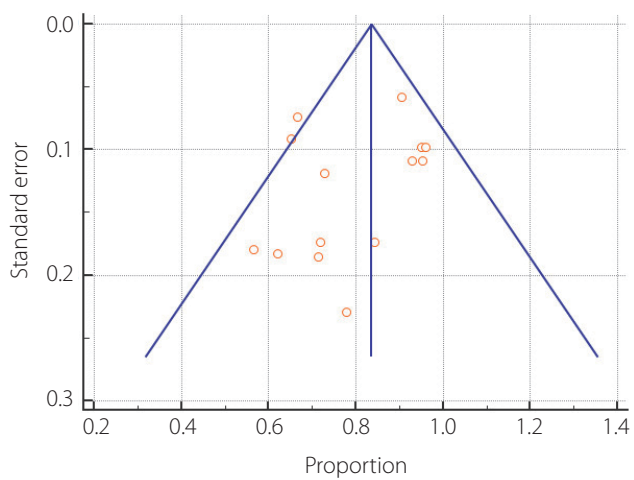

**Supplementary Fig. 3.** Funnel plot that evaluates the risk of publication bias in studies included for evaluation of occlusion rate of aneurysms treated with Silk flow diversion.
